# Supplementary material
Source: publisher figshare collection journal article supplement (https://tandf.figshare.com/ndownloader/files/19615382)
Supplement: Supplementary file 1 [file 19615382]

**Aryl ethers decorated gallic acid-naphthalimide conjugate: Aggregation and sensing toward amines and F-**

**Chiranjit Pati,** **Kumaresh Ghosh*******

*Department of Chemistry, University of Kalyani, Kalyani-741235, India. Email:ghosh_k2003@yahoo.co.in, kumareshchem18@klyuniv.ac.in Fax: +913325828282; Tel: +913325828750 Extn: 305.*

.

**Table 1S.** Results of gelation test for compound **1**.

| **Solvents** | **Results** |
| --- | --- |
| THF | S |
| 1,2-dichlorobenzene- dioxane (5:1, v/v) | G (6 ) |
| 1,2- dichloroethane | PG |
| DMSO | G (20) |
| Toluene- dioxane (5:1, v/v) | G (6) |
| CH3CN- dioxane (5:1, v/v) | G (8) |
| dioxane | S |
| CHCl3 | PS |
| CCl4 | PS |
| MeOH | I |
| S = Solution; G = Gel (minimum gelation concentration; mg/ ml); PG = partial gel; I = Insoluble; PS = partial soluble | |


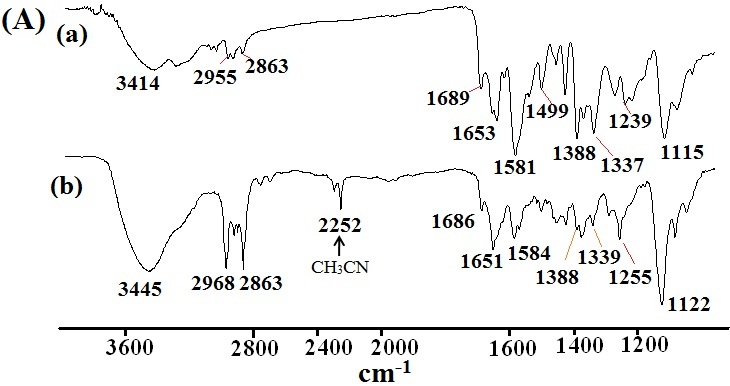


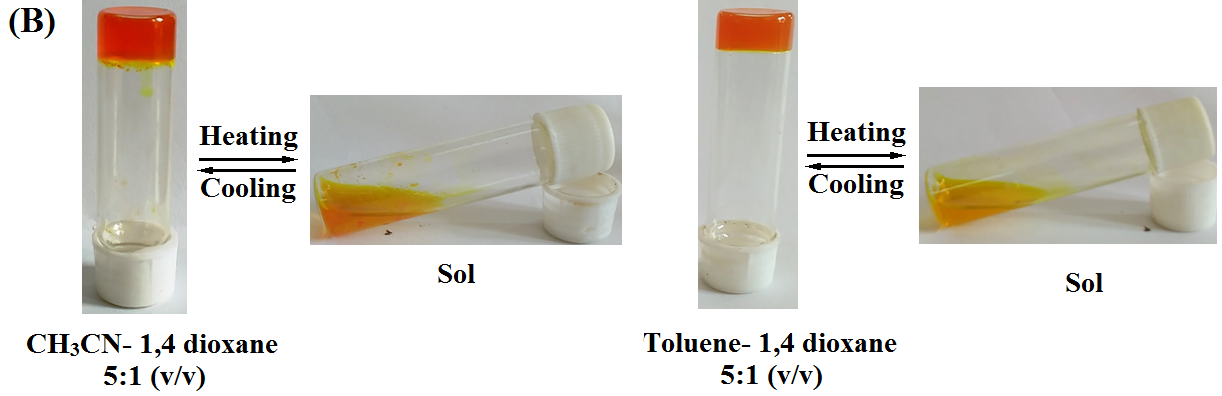


**(C)**

**Fig. 1S.** (A) Partial FTIR spectra of **1** in (a) amorphous state, (b) gel state obtained from CH3CN-1,4-dioxane (5:1, v/v); (B) Pictorial presentation of thermo-reversibilly of the gel states obtained from CH3CN-1,4-dioxane (5:1, v/v) and Toluene-1,4-dioxane (5:1, v/v); (C) Plot of Tgel with varying concentration of gelator **1** in different solvents.


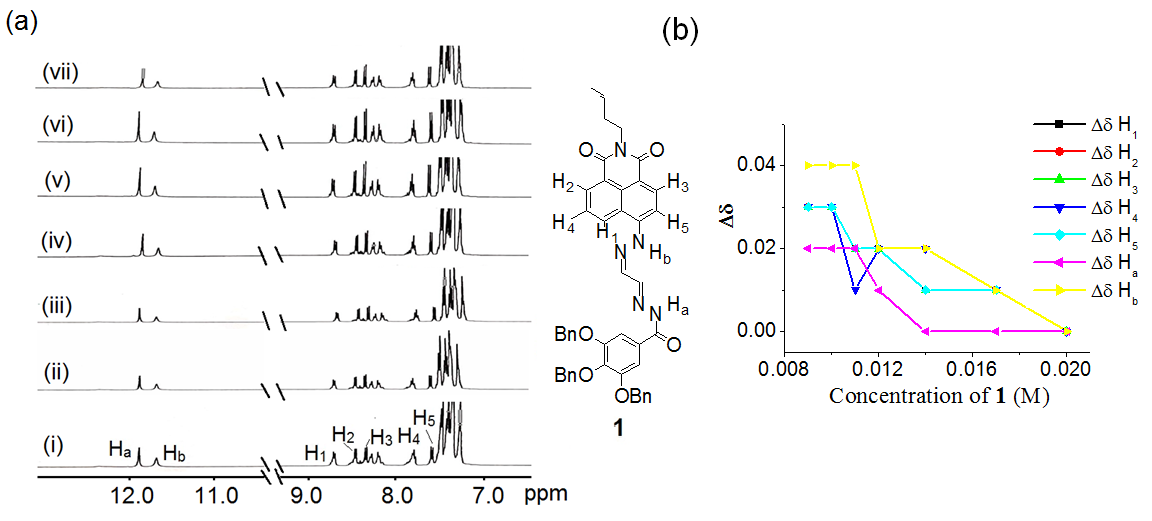


**Fig. 2S.** (a) Partial 1H NMR (400 MHz, *d6*- DMSO) of **1** at different concentrations at 25oC (i) 0.02 M, (ii) 0.017 M, (iii) 0.014 M, (iv) 0.012 M, (v) 0.011 M, (vi) 0.01 M, (vii) 0.009 M; (b) Change in chemical shift ( in ppm) of the indicated protons with concentration of **1**.


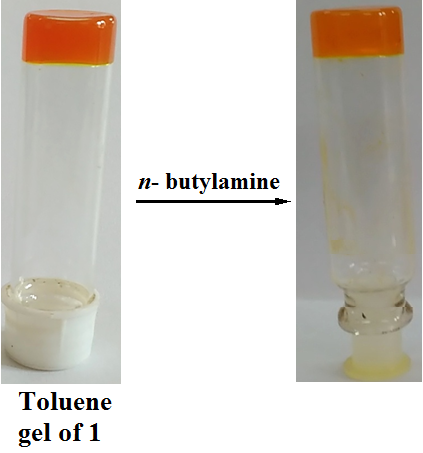

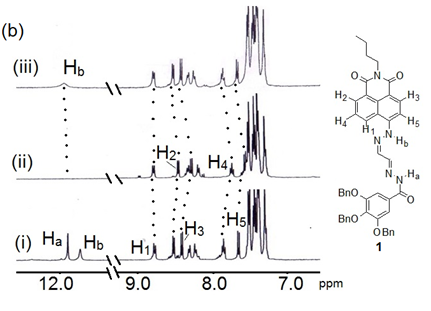


(a)

**Fig. 3S.** (a)Pictorial representation of the sensitivity of the gel of **1** in toluene-1,4-dioxane (5:1, v/v) in presence of 1 equiv. amount of *n*-butylamine (c = 0.1 M); (b) Partial 1H NMR (*d6*- DMSO, 400 MHz) of (i) **1** (*c* = 5.53 x 10-3 M) and (ii) **1** in the presence of 1 equiv. amount of *n*-butylamine followed treatment with (iii) acetic acid.


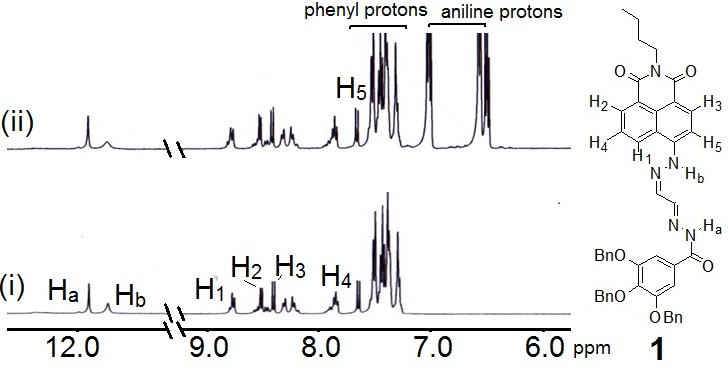


(a) (b) (b)

**Fig. 4S.** (a) Comparison of emission spectra of CH3CN-1,4-dioxane (5:1, v/v) gel of **1** in the absence and presence of *n*-butylamine (λex = 445 nm); (b) Partial 1H NMR spectra (400 MHz, *d6*- DMSO) of (i) **1** (*c* = 5.87 x 10-3 M) and (ii) **1** in the presence of 5 equiv. amounts of aniline.


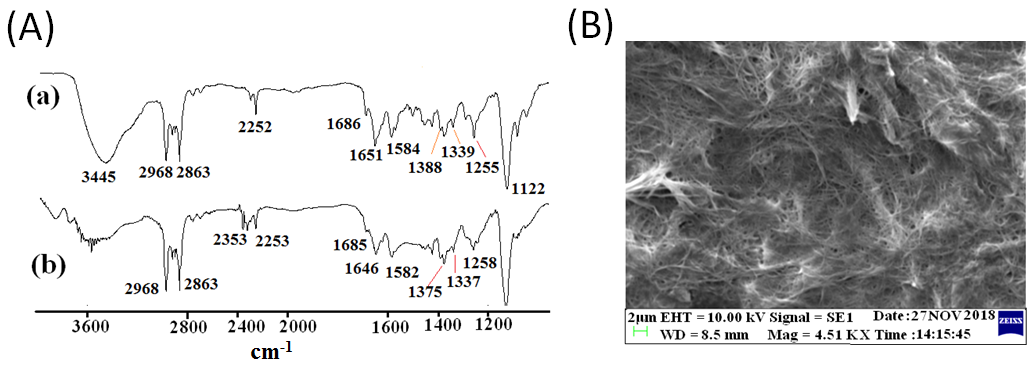


**Fig. 5S.** (A)Partial FTIR spectra of gel of **1** (prepared from CH3CN-1,4-dioxane (5:1, v/v)) (a) in absence and (b) presence of *n*-butylamine; (B) SEM image of the *n*-butylamine treated xerogel.


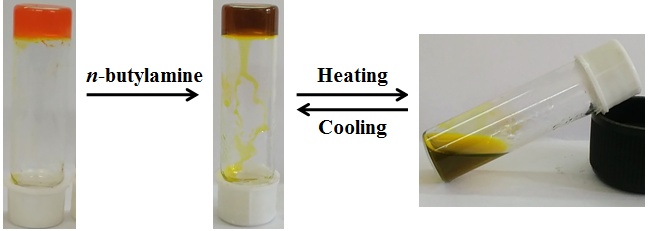


**Fig. 6S.** Pictorial representation of thermo-reversibility of 1 equivalent amount of *n*-butylamine (c = 0.1 M) treated gel of **1** in CH3CN-1,4-dioxane (5:1, v/v).


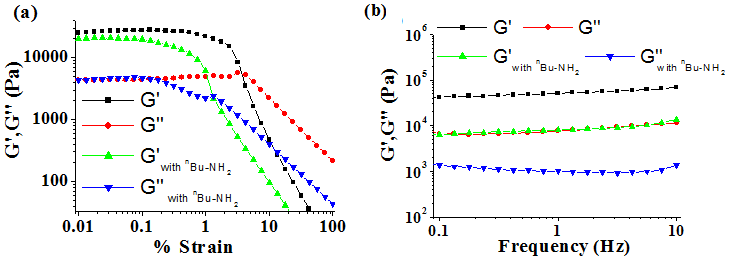


**Fig. 7S.** (a) Amplitude and (b) Frequency sweep experiments of CH3CN-1,4-dioxane (5:1, v/v) gel of **1** without and with 1 equiv. amount of *n*-butylamine (*c* = 0.1 M). Amplitude sweep experiment was carried out at constant frequency of 1Hz and frequency sweep experiment was conducted at constant 0.1 % strain. Gelator concentration was 8 mg/mL.

**Table 2S**. Summary of the rheological properties of the gels of **1** in CH3CN-1,4-dioxane (5:1,

v/v)

| Gels | Crossover (% strain) | G′av (Pa)* | G′′av (Pa)* |
| --- | --- | --- | --- |
| **1** | 3.5 | 52400 | 8150 |
| **1** with  n-butylamine | 1.3 | 8530 | 1081 |

* G′av and G′′av values were calculated from frequency sweep data.


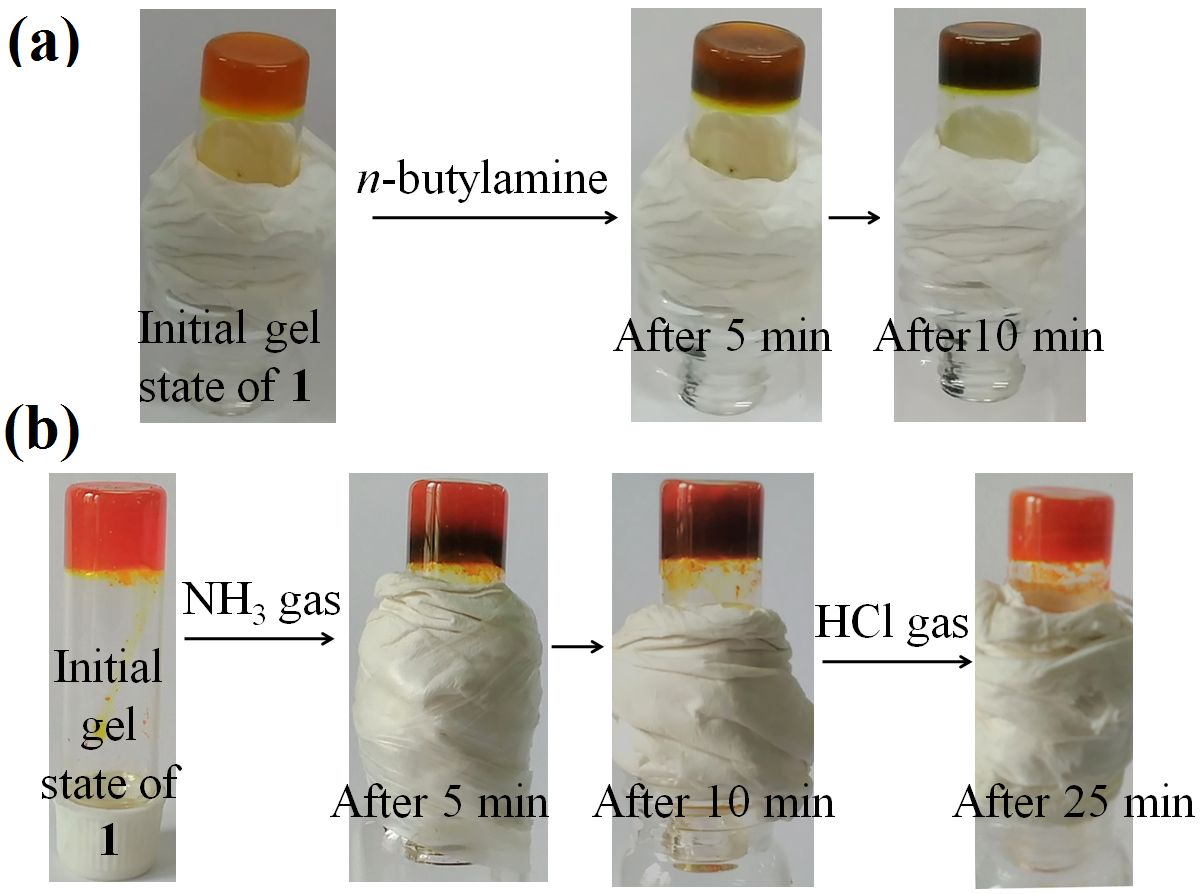


**Fig. 8S.** Vapor phase detection through color change: (a)in presence of 1 equiv. amount of *n*-butylamine (*c* = 0.1 M) and (b) NH3 using CH3CN-1,4-dioxane (5:1, v/v) gel of **1**.

**Fig. 9S.** UV-vis titration spectra of **1** (*c* = 2.50 x 10-5 M) upon addition of (a) ethanolamine, (b) N2H4, (c) NH2OH, (d) aniline, (e) pyridine, (f) dimethylamine (DMA), (g) Et3N (*c* = 1.0 x 10-2 M) in CH3CN containing 1% THF.


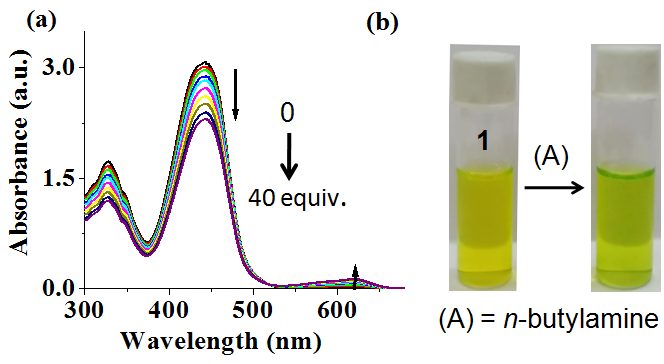


**Fig. 10S.** Change in absorbance of **1** (*c* = 1 x 10-4 M) upon addition of 40 equiv. amounts of *n*-butylamine (*c* = 1.0 x 10-2 M) in CH3CN containing 1% THF; (b) Color change of **1** (*c* = 1 x 10-4 M) upon addition of 40 equiv. amounts of *n*-butylamine (*c* = 1.0 x 10-2 M) in CH3CN containing 1% THF.

**Fig. 11S.** (a) Benesi–Hilderband plots for **1** (*c* = 2.5 x 10-5 M) with (a) *n*-butylamine, (b) dimethylamine (DMA), (c) triethylamine (Et3N) (*c* = 1.0 x 10-3 M) at 442 nm from UV-vis study inCH3CN containing 1% THF.


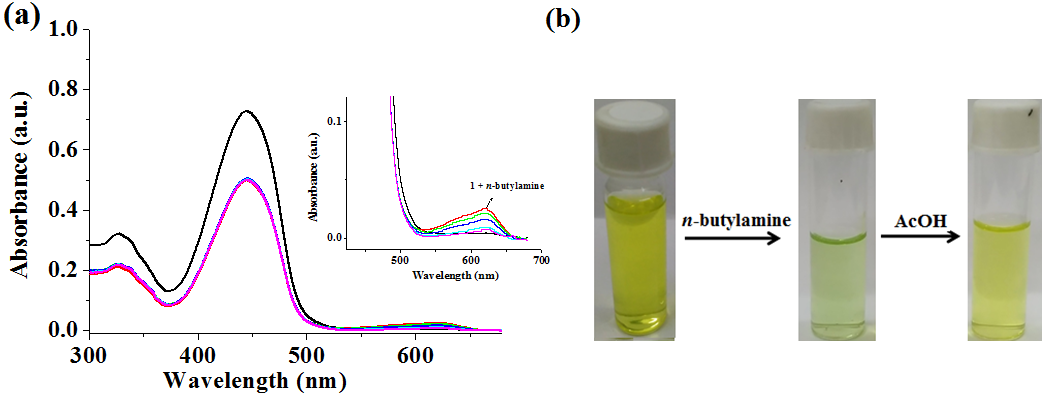


**Fig. 12S.** (a)Change in absorbance of **1** (*c* = 2.50 x 10-5 M) with *n*-butylamine followed by addition of acetic acid (*c* = 1.0 x 10-2 M) in CH3CN containing 1% THF; (b) Color change upon addition of *n*-butylamine followed by acetic acid.

**Fig. 13S.** Change in emission of **1** (*c* = 2.50 x 10-5 M) upon addition of (a) *n*-butylamine, (b) dimethylamine, (c) Et3N, (d) ethanolamine, (e) N2H4, (f) NH2OH, (g) aniline, (h) pyridine (*c* = 1.0 x 10-2 M) containing 1% THF in CH3CN ( λex = 445 nm).


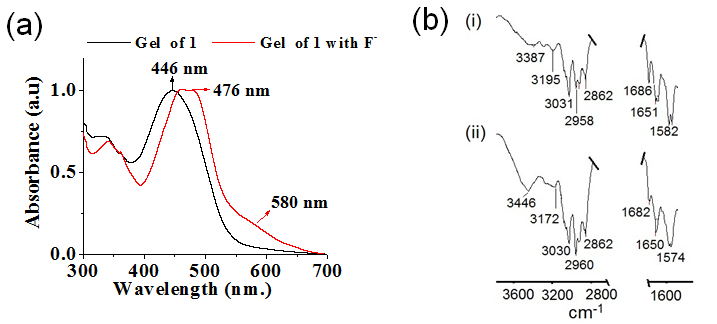


**Fig. 14S**. Comparison of normalized UV-vis spectra of toluene-1,4-dioxane (5:1, v/v) gel of **1** before and after treatment with F- ions; (b) Partial FTIR spectra of gel of (i) **1** [prepared from toluene-1,4-dioxane (5:1, v/v)]and(ii) gel of **1** with F- ions.


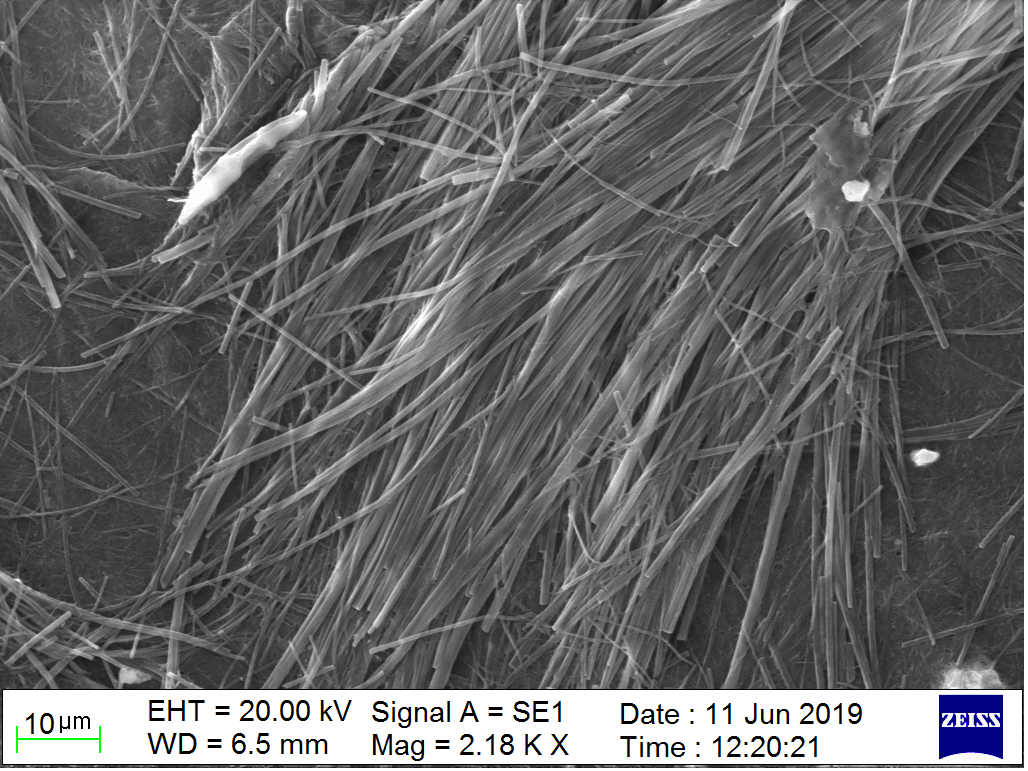


**Fig. 15S.** SEM image of the xerogel of **1** prepared from toluene-1,4-dioxane (5:1, v/v) after treatment with F- ions.


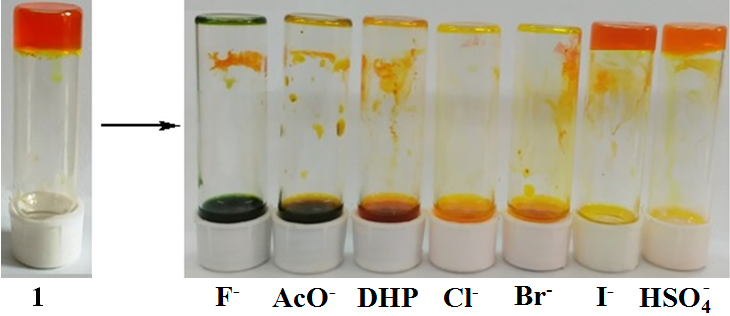


**Fig. 16S**. Photograph showing the changes in gel state of **1** in CH3CN-1,4-dioxane (5:1 v/v)(*c* = 6 mg/mL) upon addition of 1 equiv. amount of different anions (c = 0.08 M) after 25 min.

**Fig. 17S.** Change in absorbance of **1** (*c* = 2.5 x 10-5 M) from 0 up to 15 equiv. amounts of tetrabutylammonium salts of (a) F-, (b) AcO-, (c) DHP, (d) Cl-, (e) Br-, (f) I-, (g) HSO4- (*c* =1 x 10-3 M) in1% THF in CH3CN.


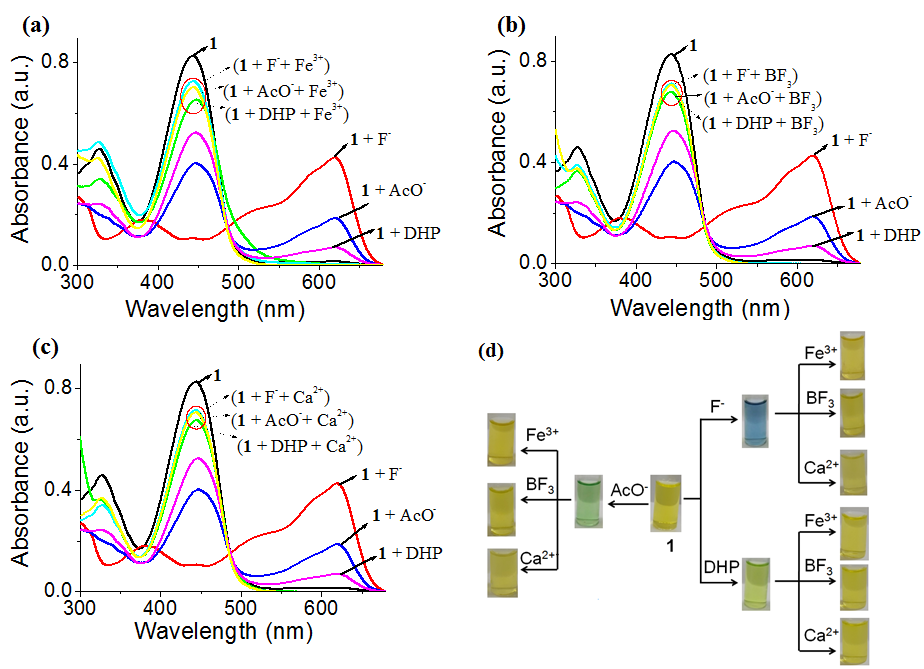


**Fig. 18S.** Change in absorbance of **1** (c =2.5 x 10-5 M) upon addition of 15 equiv. amounts of F-, AcO- and H2PO4- (DHP) (c =1 x 10-3 M) ions as their tetrabutylammonium salts followed by addition of 4 equiv. amounts of (a) Fe(ClO4)3, (b) BF3 and Ca(ClO4)2 (c =1 x 10-3 M) in CH3CN containing 1% THF; (d) Change in color of the solution of **1** (c =2.5 x 10-5 M) in CH3CN containing 1% THF during the experiments mentioned in (a), (b) and (c).


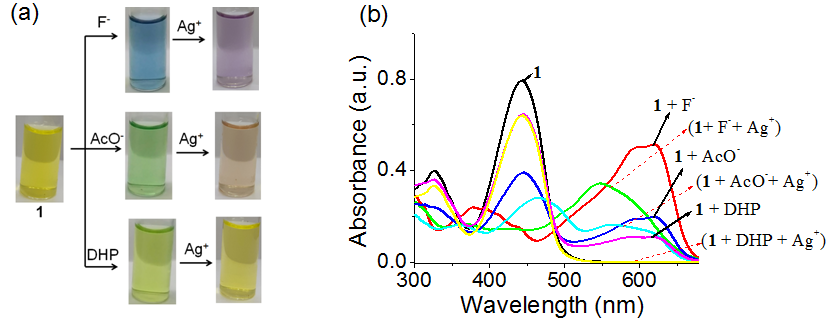


**Fig. 19S**. Change in (a) color and (b) absorbance of **1** (c =2.5 x 10-5 M) upon addition of 15 equiv. amounts of each anions (c =1 x 10-3 M) followed by addition of 6 equiv. amounts of AgClO4 (c =1 x 10-3 M) in CH3CN containing 1% THF.


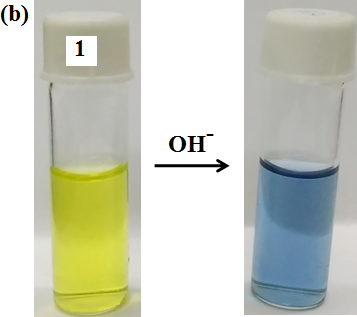


**Fig. 20S.** Change in (a) absorbance and (b) color of **1** (c = 2.5 x 10-5 M) in CH3CN containing 1% THF upon addition of 15 equiv. amounts of tetrabutylammonium hydroxide (*c* =1 x 10-3 M).

**Fig. 21S.** Change in absorbance of **1** (c = 2.5 x 10-5 M) in presence of 15 equiv. amounts of (a) F-, (b) AcO- and then upon gradual addition of H2O.


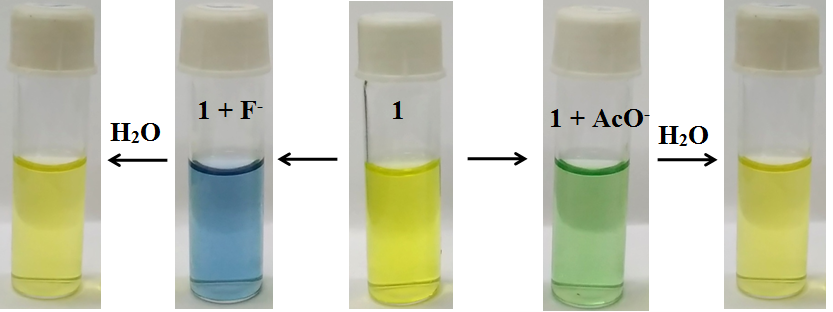


**Fig. 22S.** Change in colour of **1** (c = 2.5 x 10-5 M) in presence of 15 equiv. amounts of F- and AcO- followed by addition of H2O.


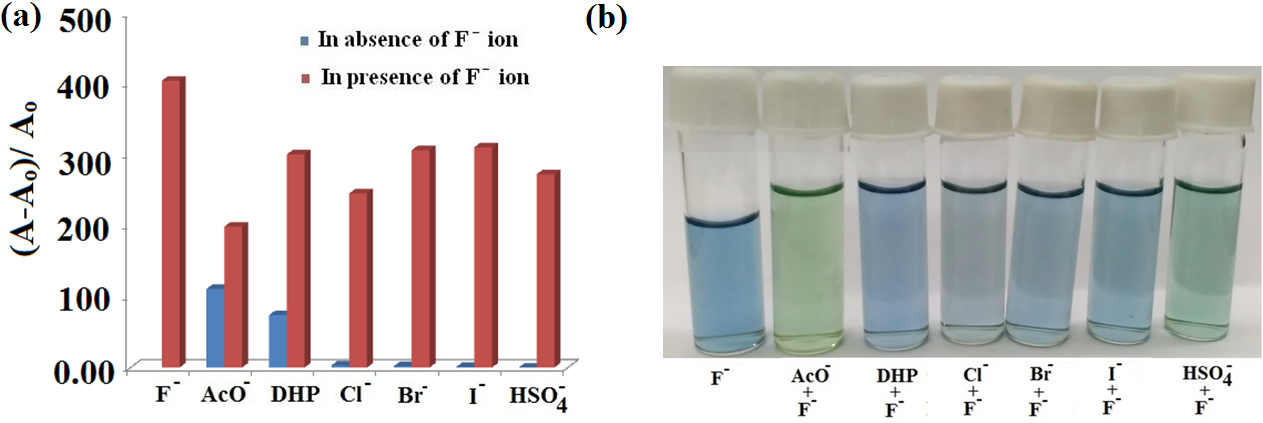


**Fig. 23S.** (a) Absorbance ratio of **1** (c = 2.5 x 10-5 M) at 620 nm upon addition of 15 equiv. amounts of F-  ionsto the solutioncontaining 15 equiv. amounts other anions in CH3CN containing 1% THF and (b) the associated color changes.

**Fig. 24S.** Change in emission (λex = 445 nm) of **1** *(c* = 2.5 x 10-5 M) upon addition of 8 equiv. amounts of tetrabutylammonium salts of (a) AcO-, (b) DHP, (c) Cl-, (d) Br-, (e) I-, (f) HSO4-, (g) OH- (*c* = 1 x 10-3 M) in CH3CN containing 1% THF.


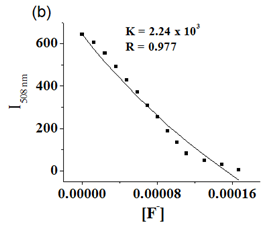


**Fig. 25S.** (a) UV-vis Job plot of **1** with F- at 445 nm in CH3CN containing 1% THF where [H] = [G] = 2.5 x 10-5 M; (b) Non linear fitting of the titration data for **1** (*c* = 2.5 x 10-5 M) with F- (*c* = 1.0 x 10-3 M) at 508 nm inCH3CN containing 1% THF and (c) Detection limit of **1** (*c* = 2.5 x 10-5 M) for F- (*c* = 1.0 x 10-3 M) inCH3CN containing 1% THF.


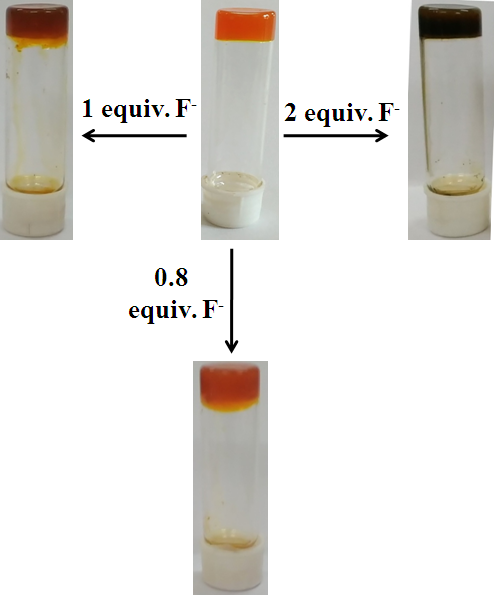


**Fig. 26S.** The color change of gel phase of **1** in toluene-1,4-dioxane (5:1 v/v)(*c* = 6 mg/mL) upon addition of different equiv. amounts of TBAF (c = 0.08 M).


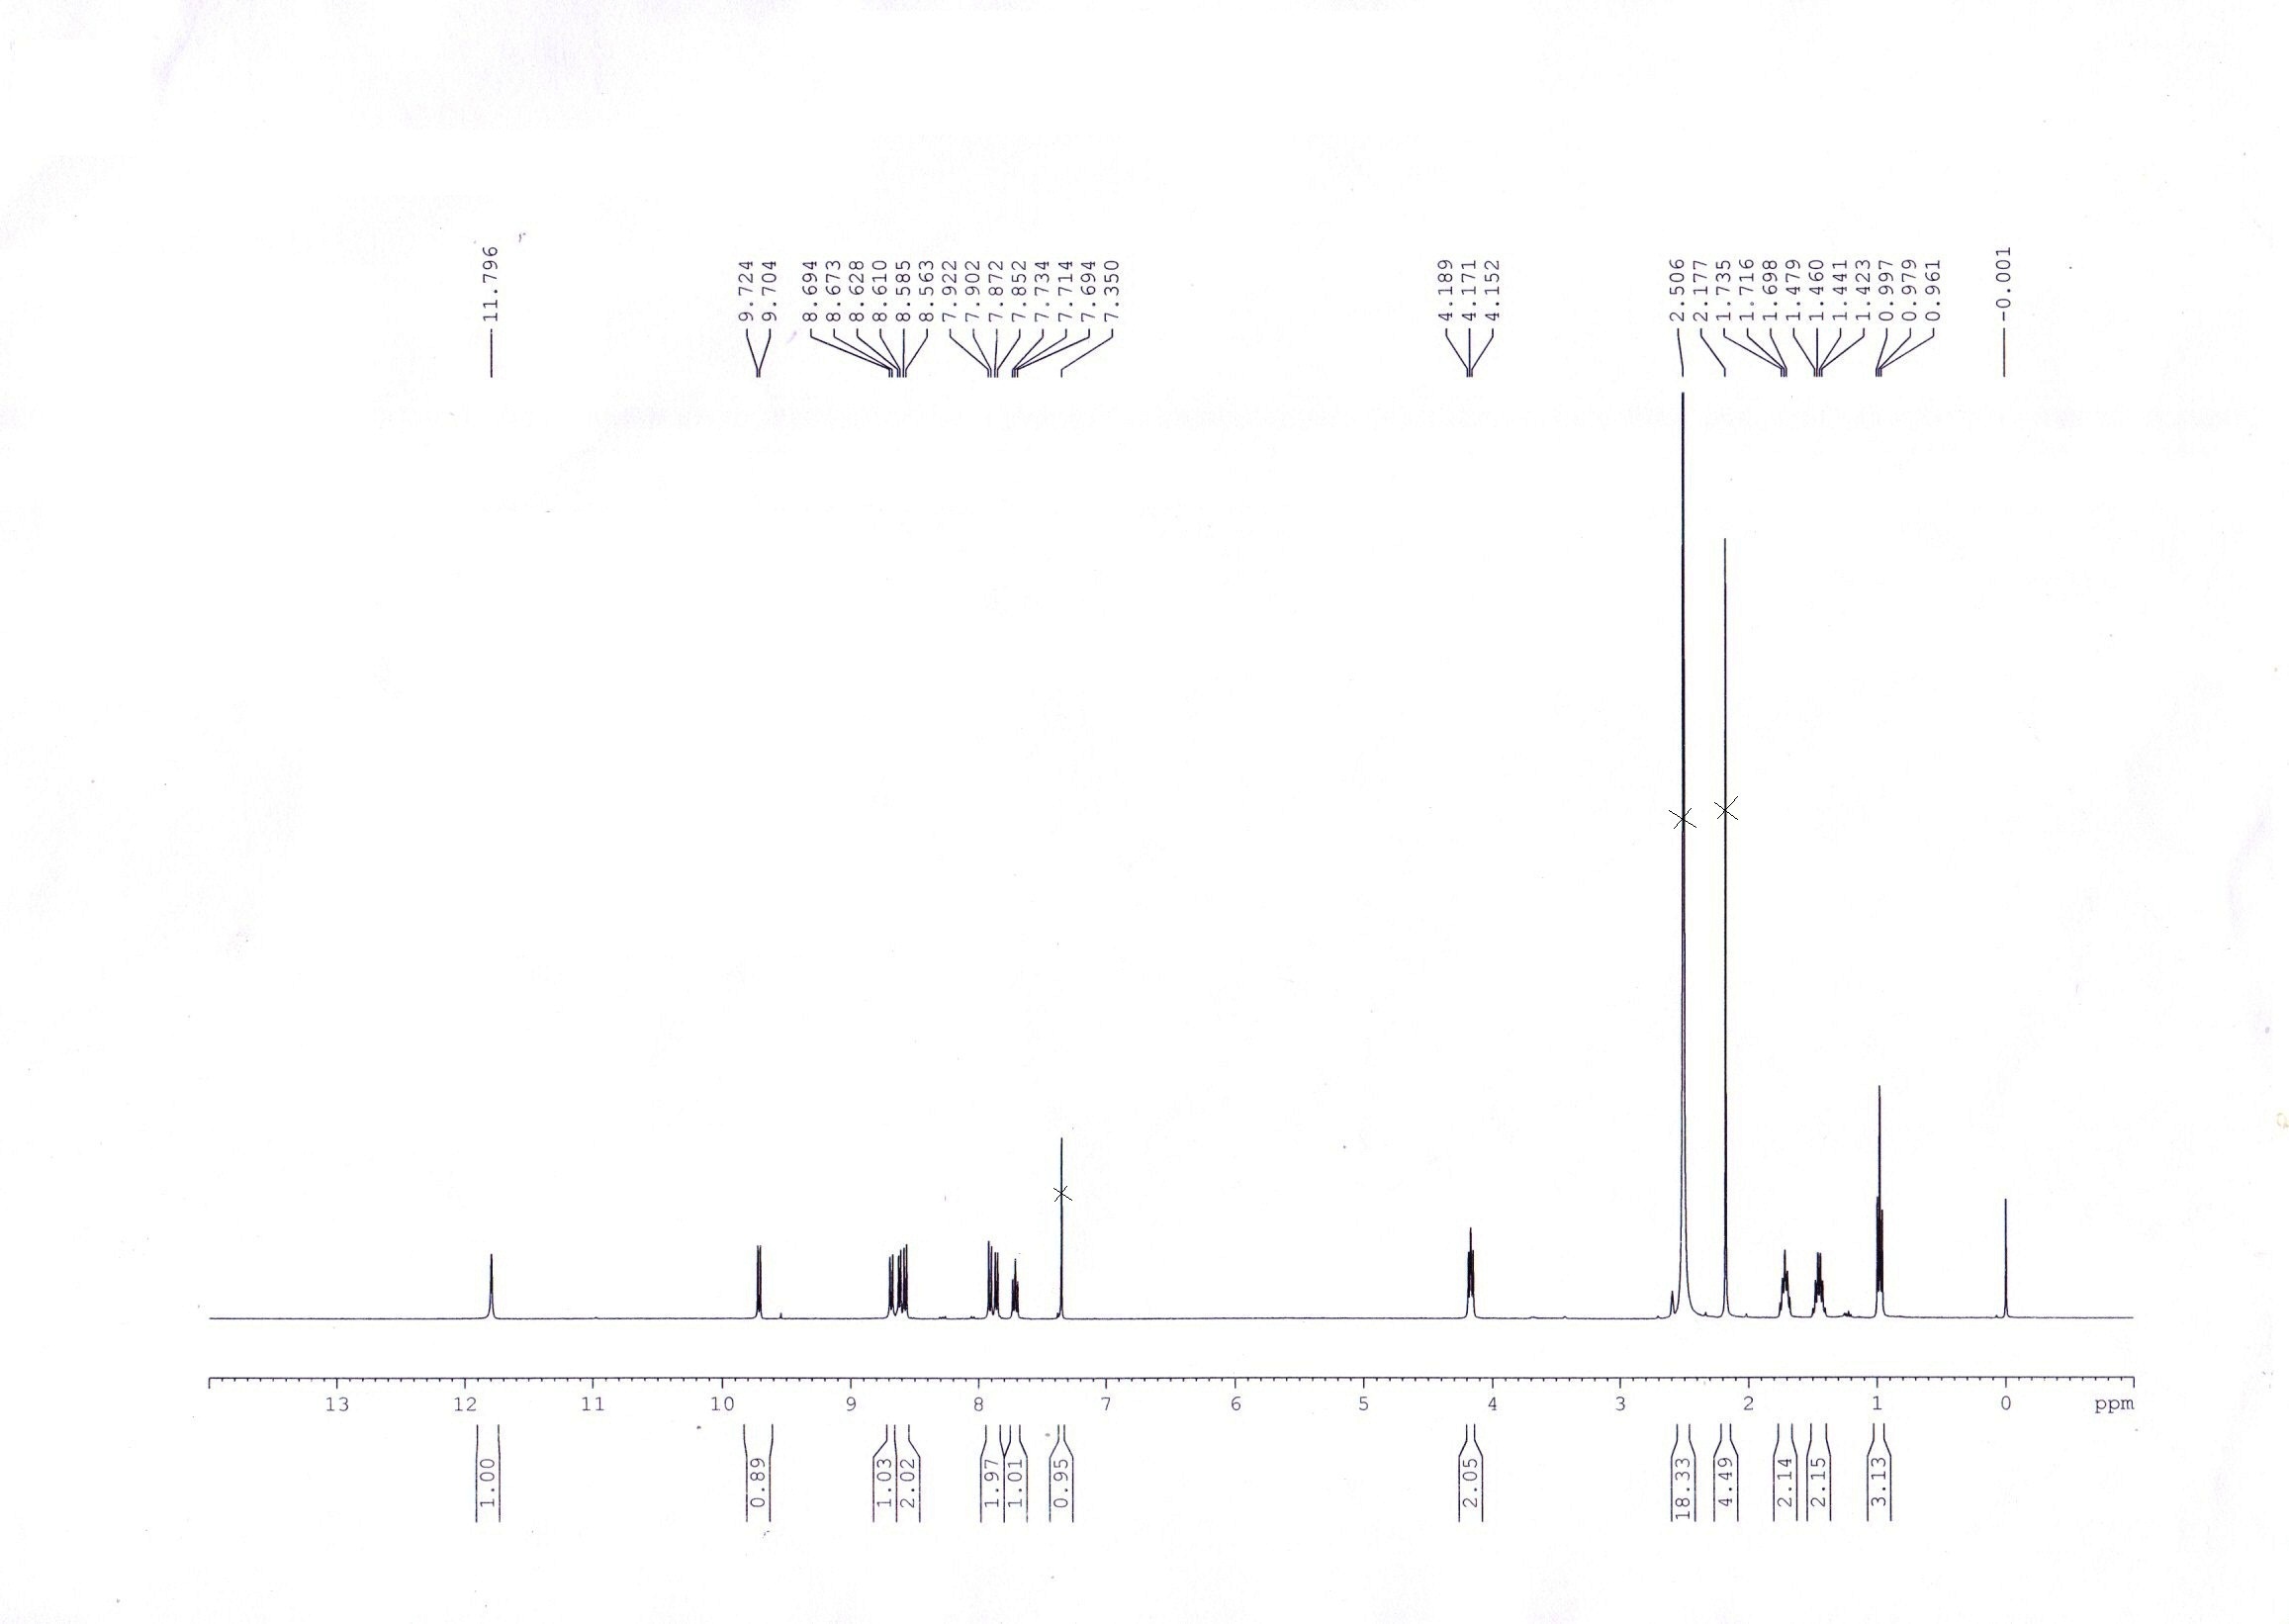


**Fig. 27S.** 1H NMR (400 MHz) of compound **5** in CDCl3 containing few drops of *d6*-DMSO.


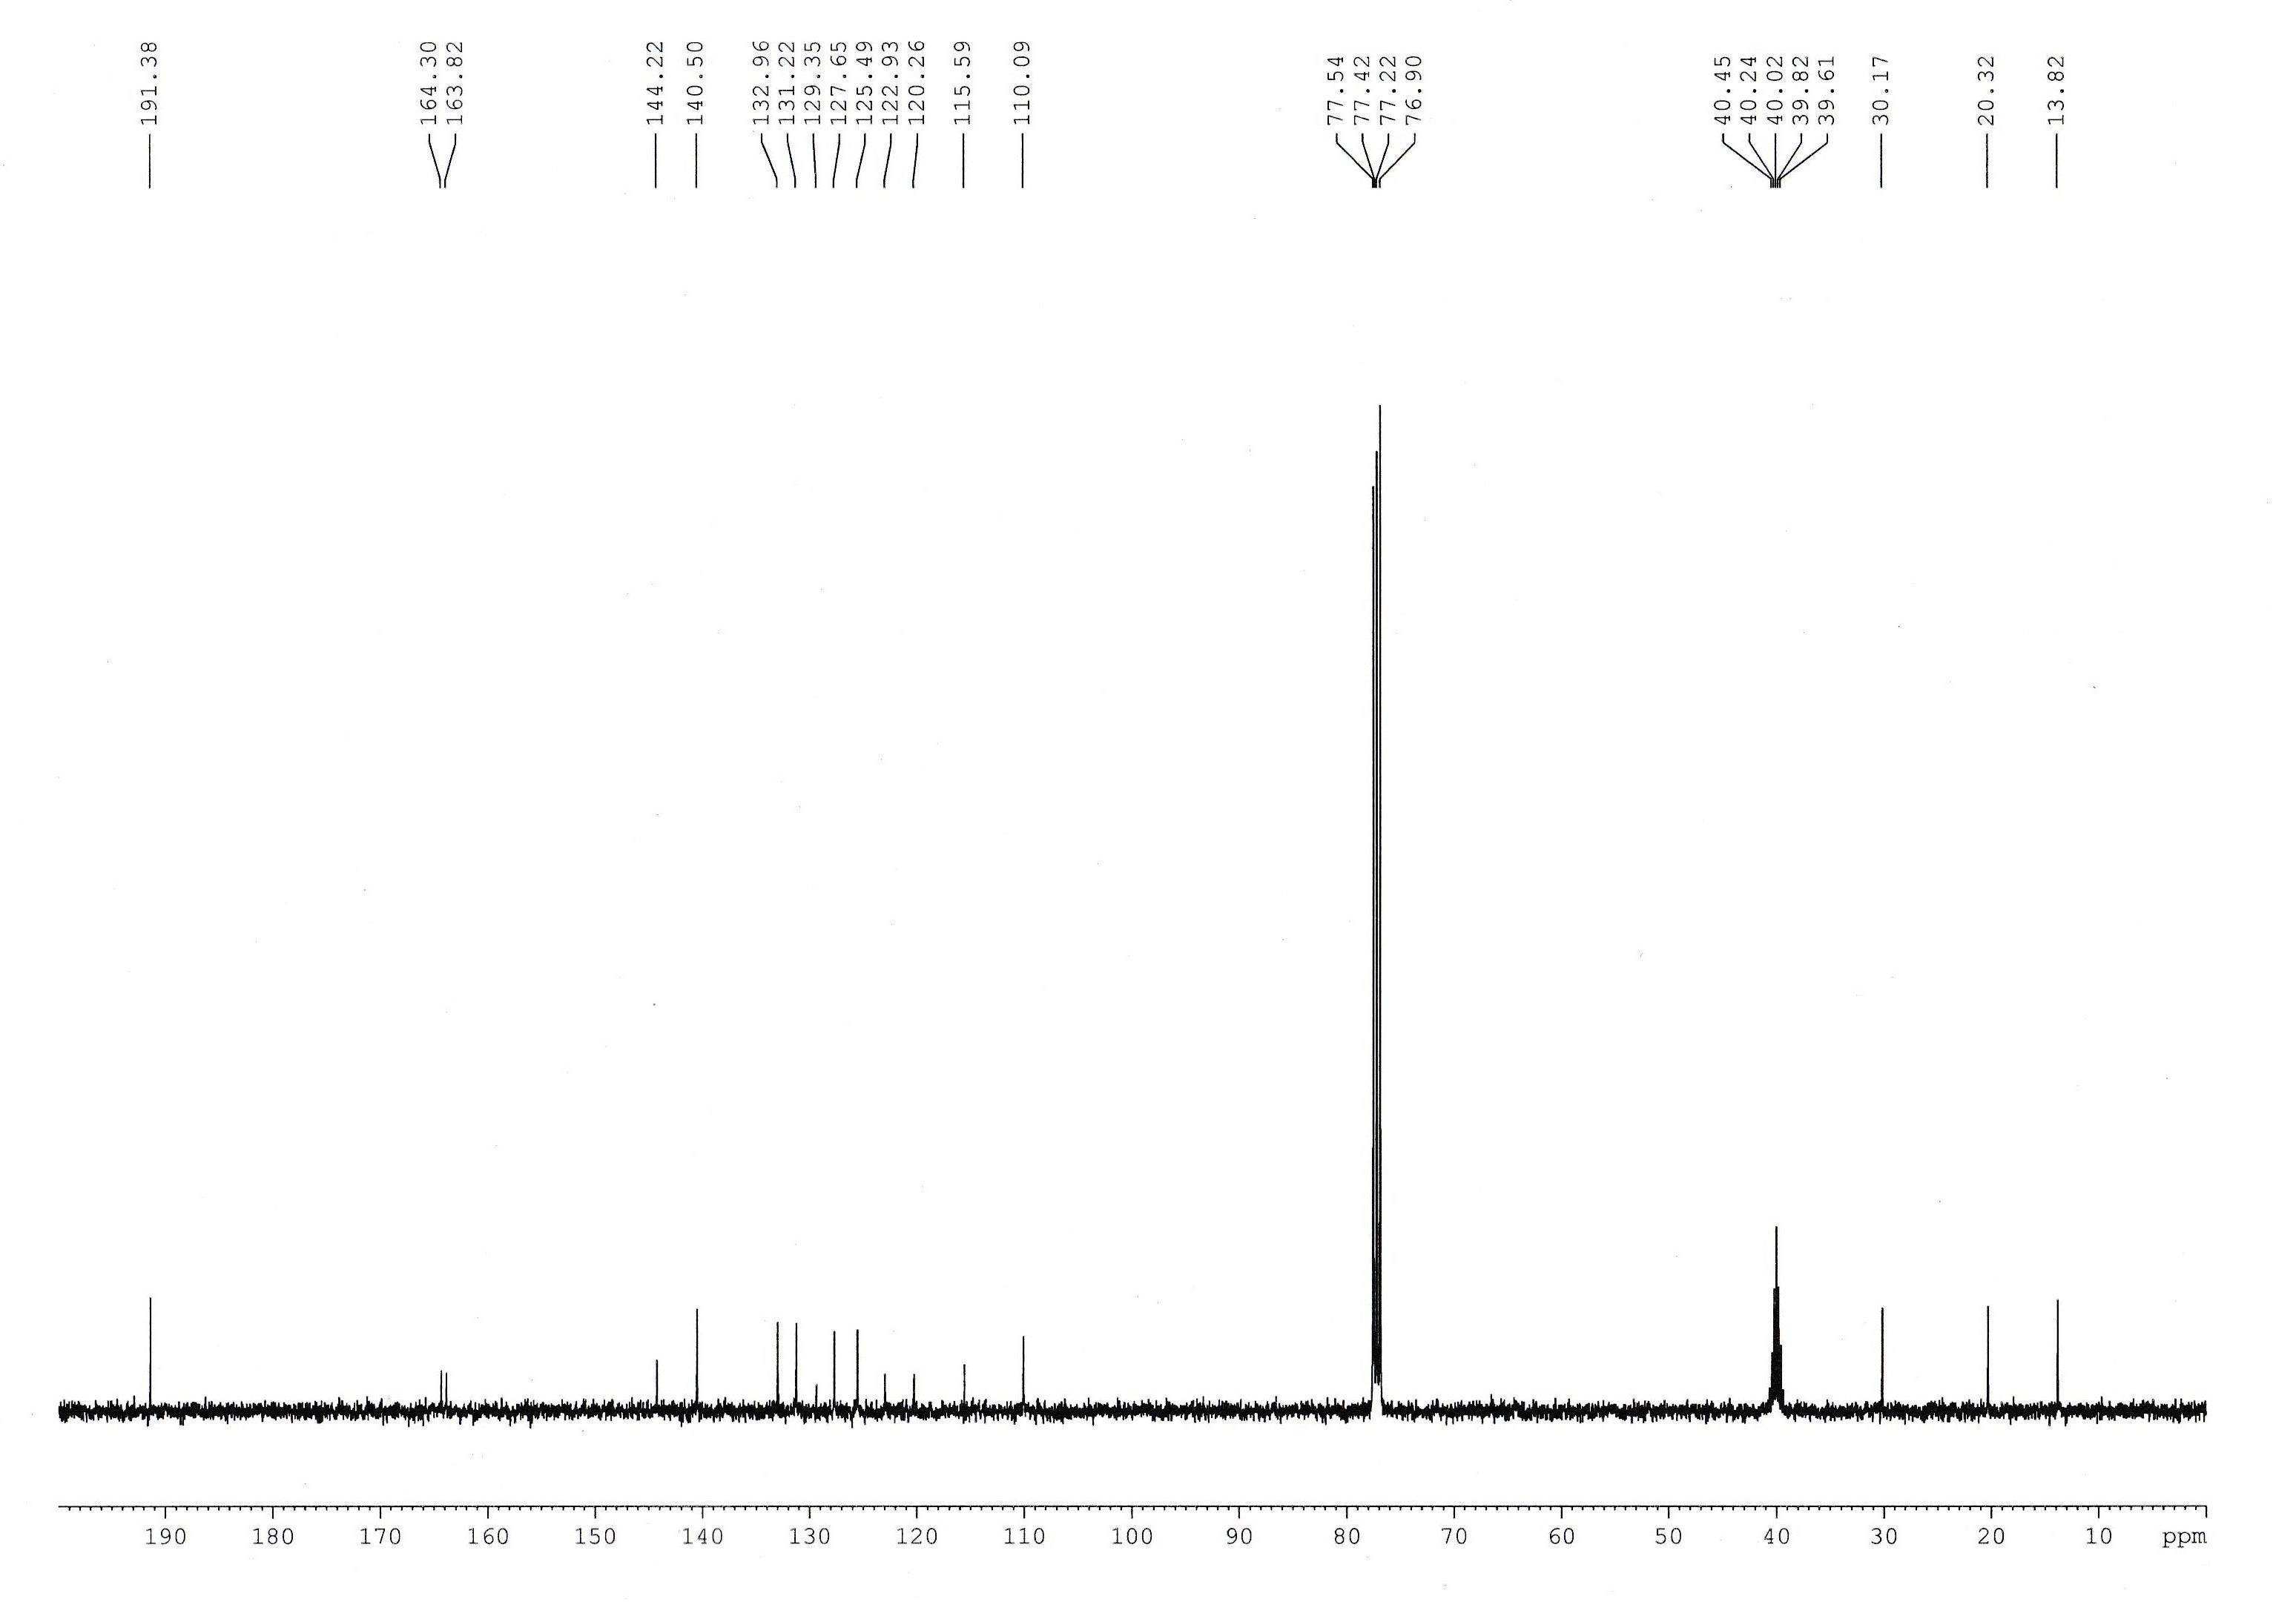


**Fig. 28S.** 13C NMR of **5** in CDCl3 containing two drops of *d6*-DMSO (100 MHz).


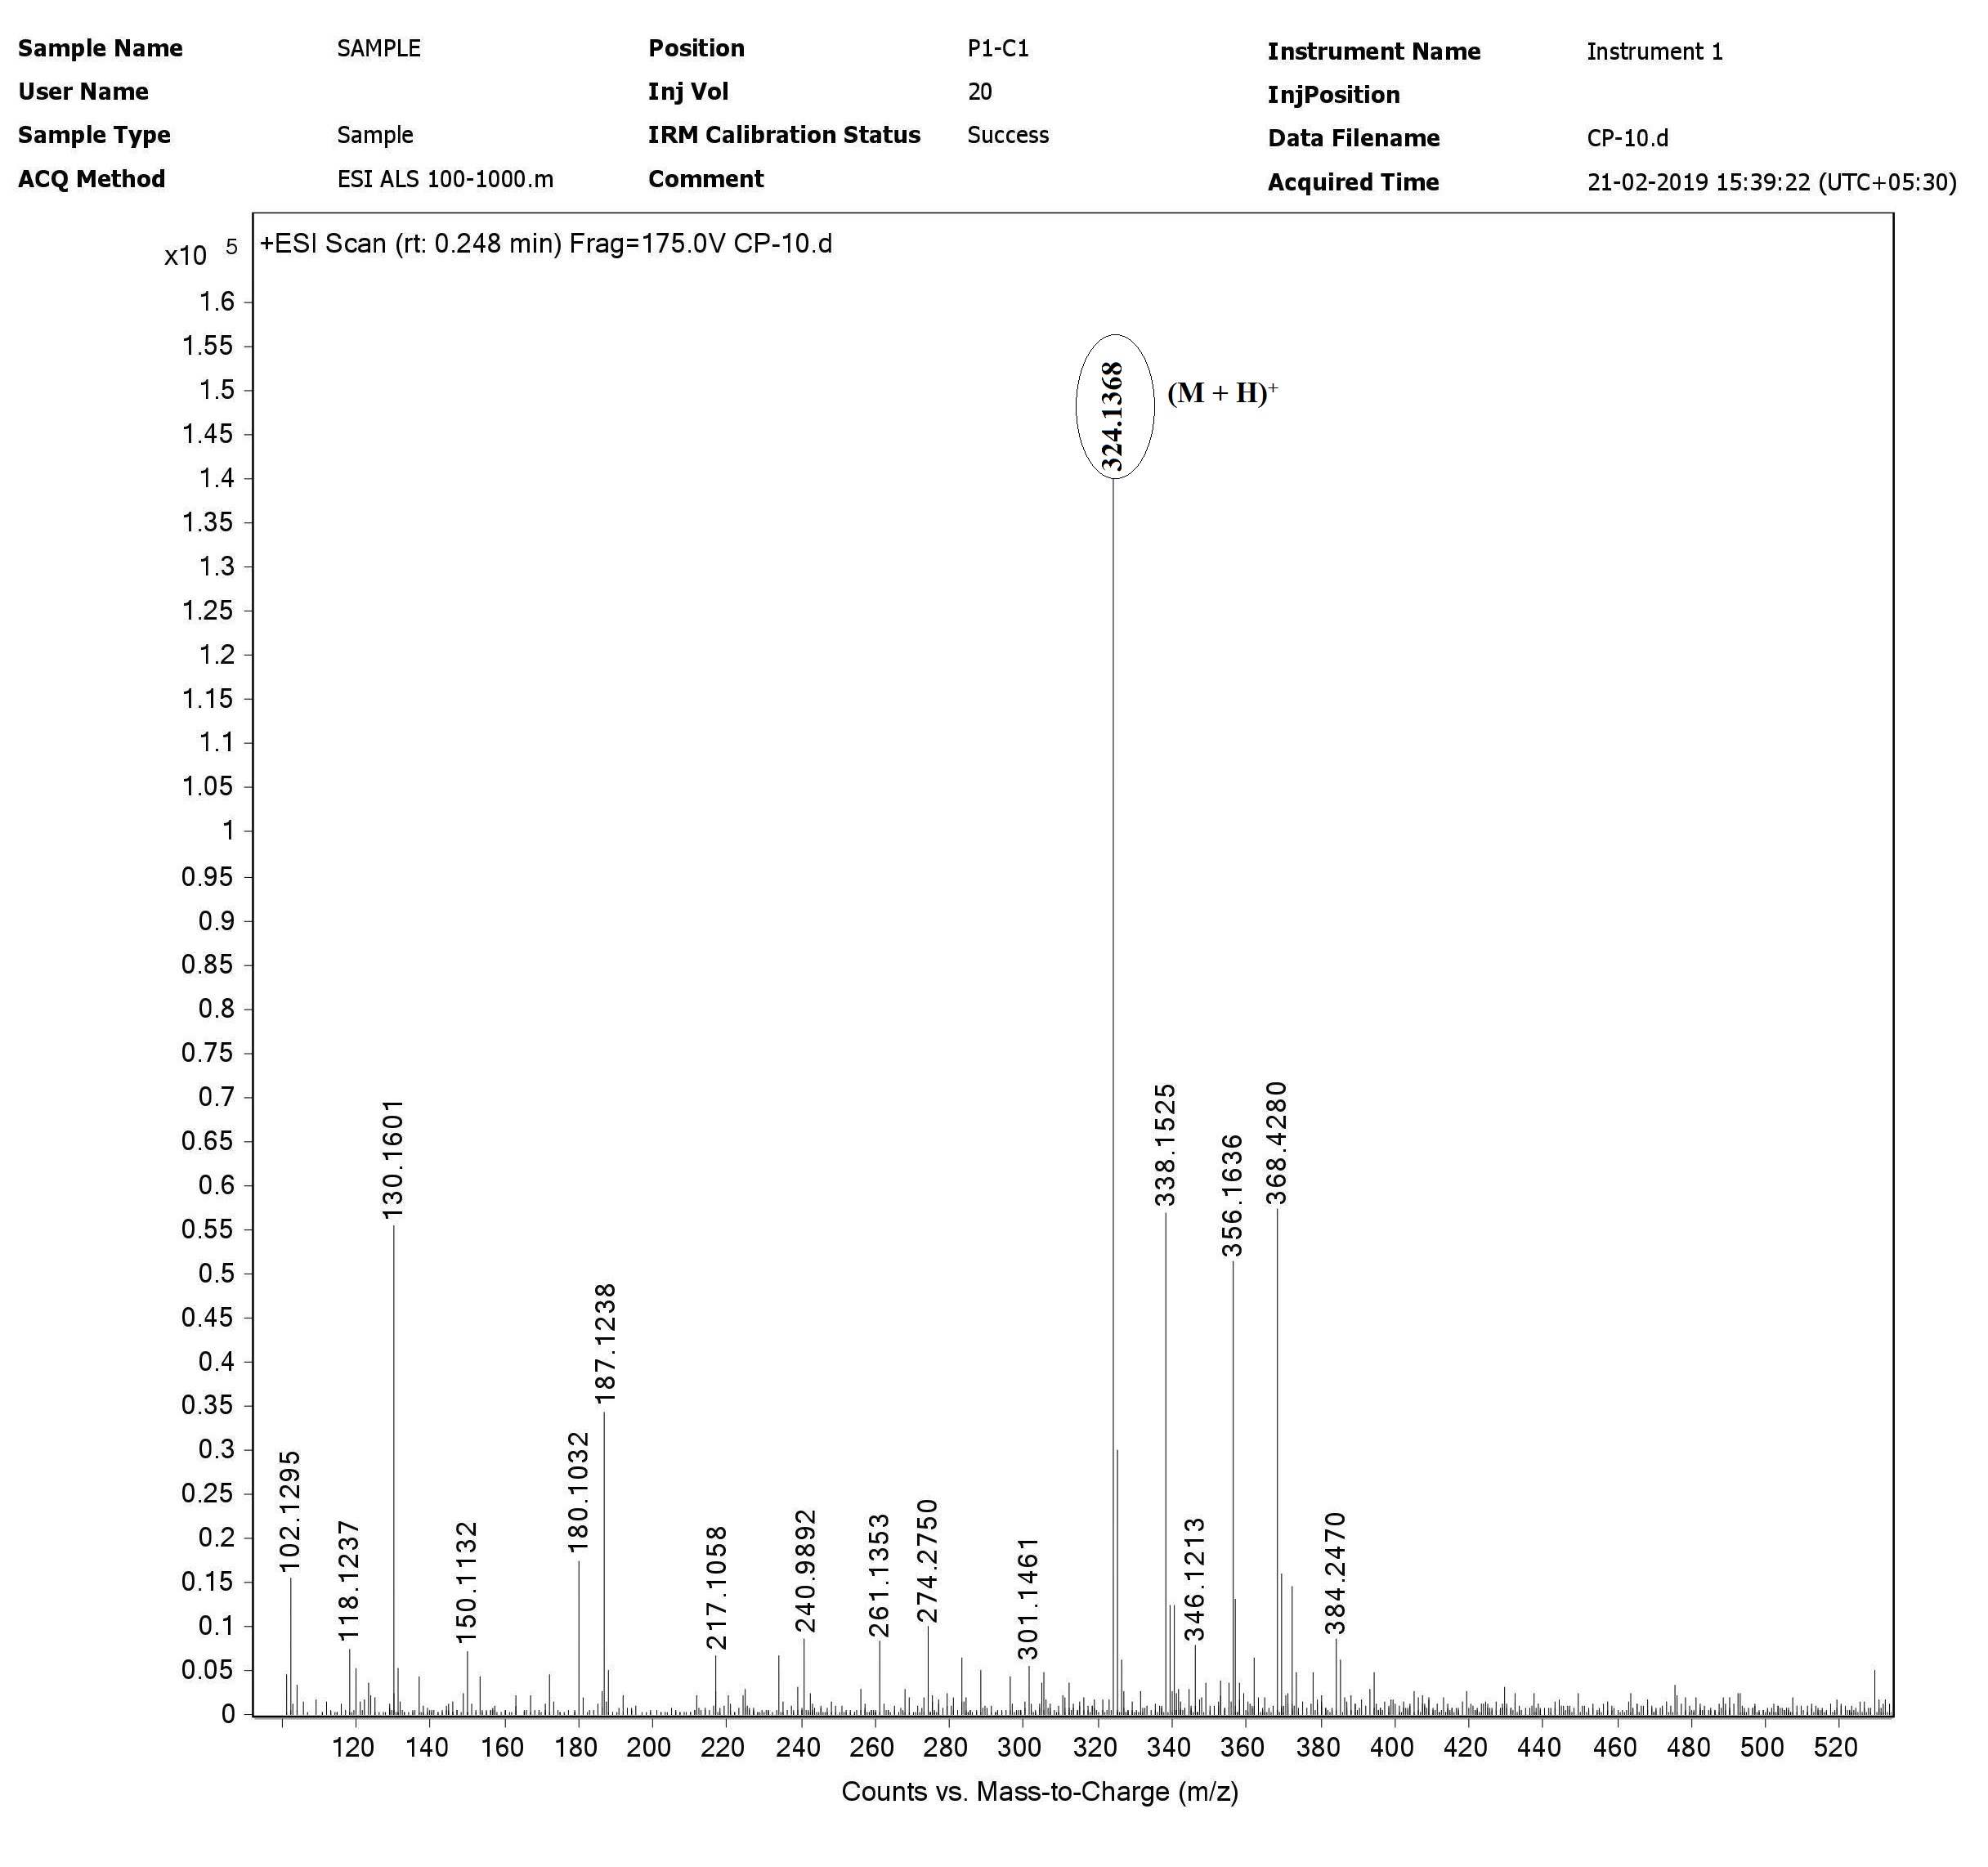


**Fig. 29S.** HRMS spectrum of **5**.


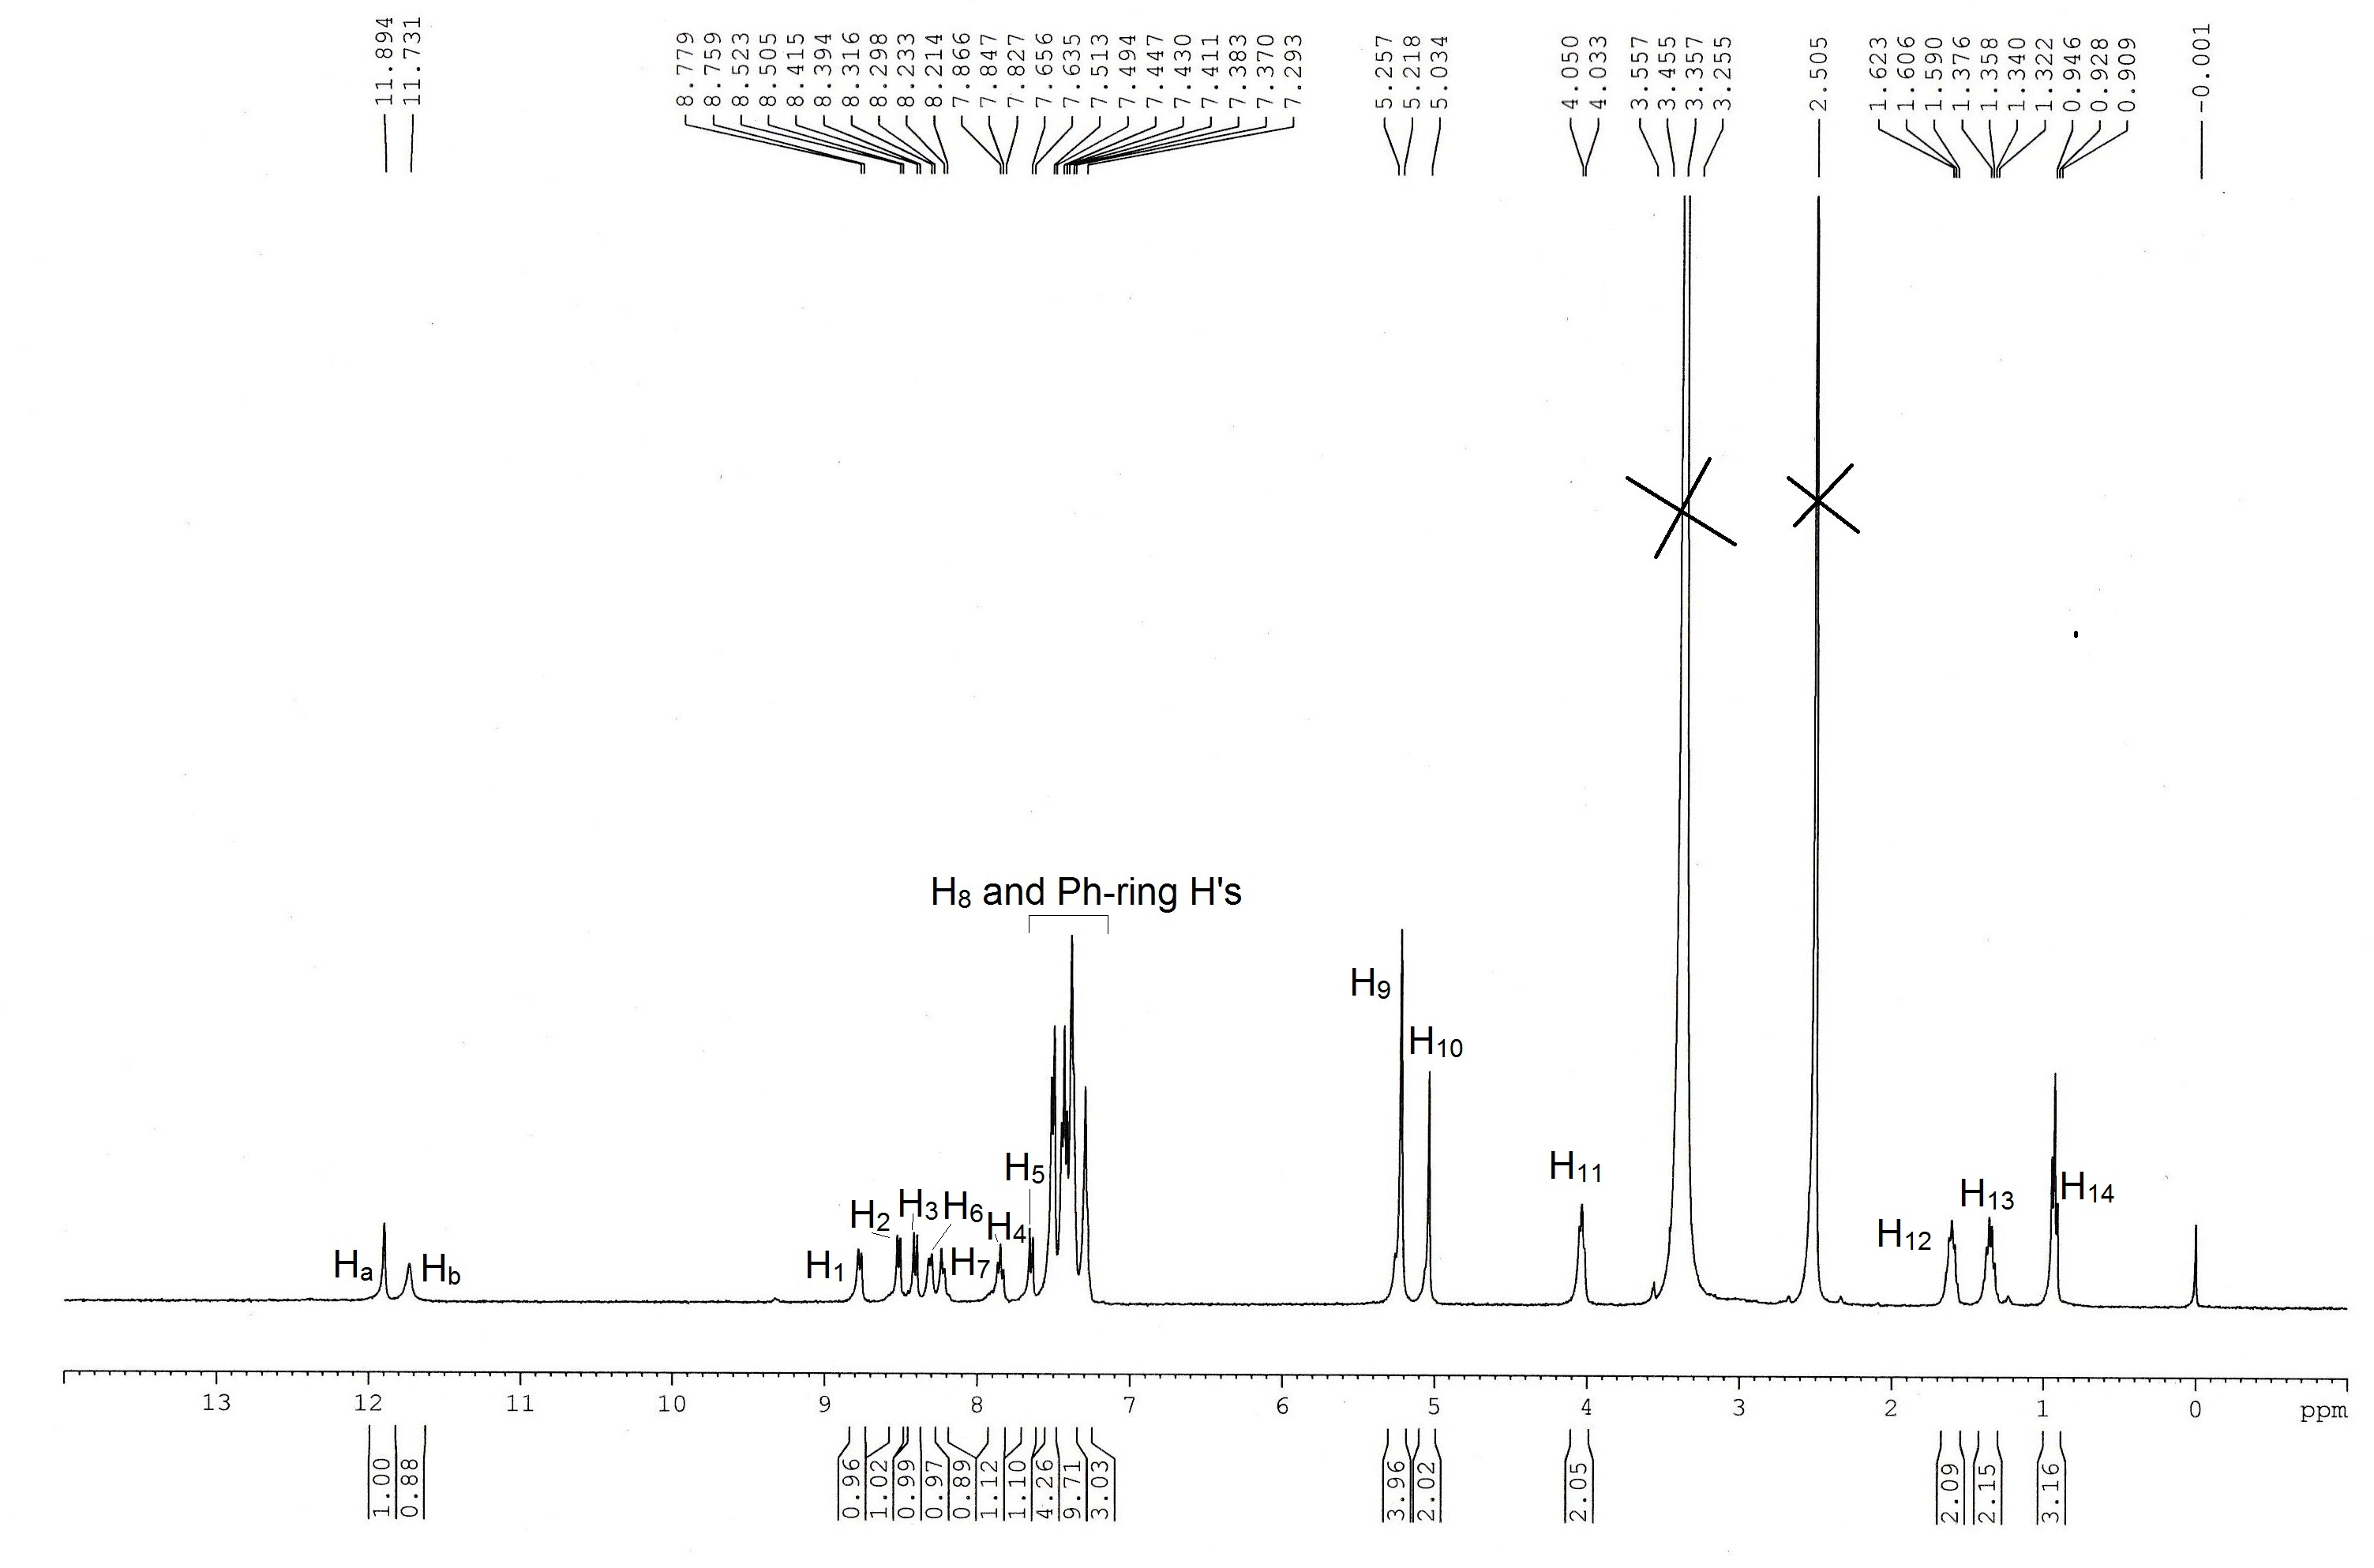


**Fig. 30S.** 1H NMR (400 MHz) of compound **1** in *d6*-DMSO.


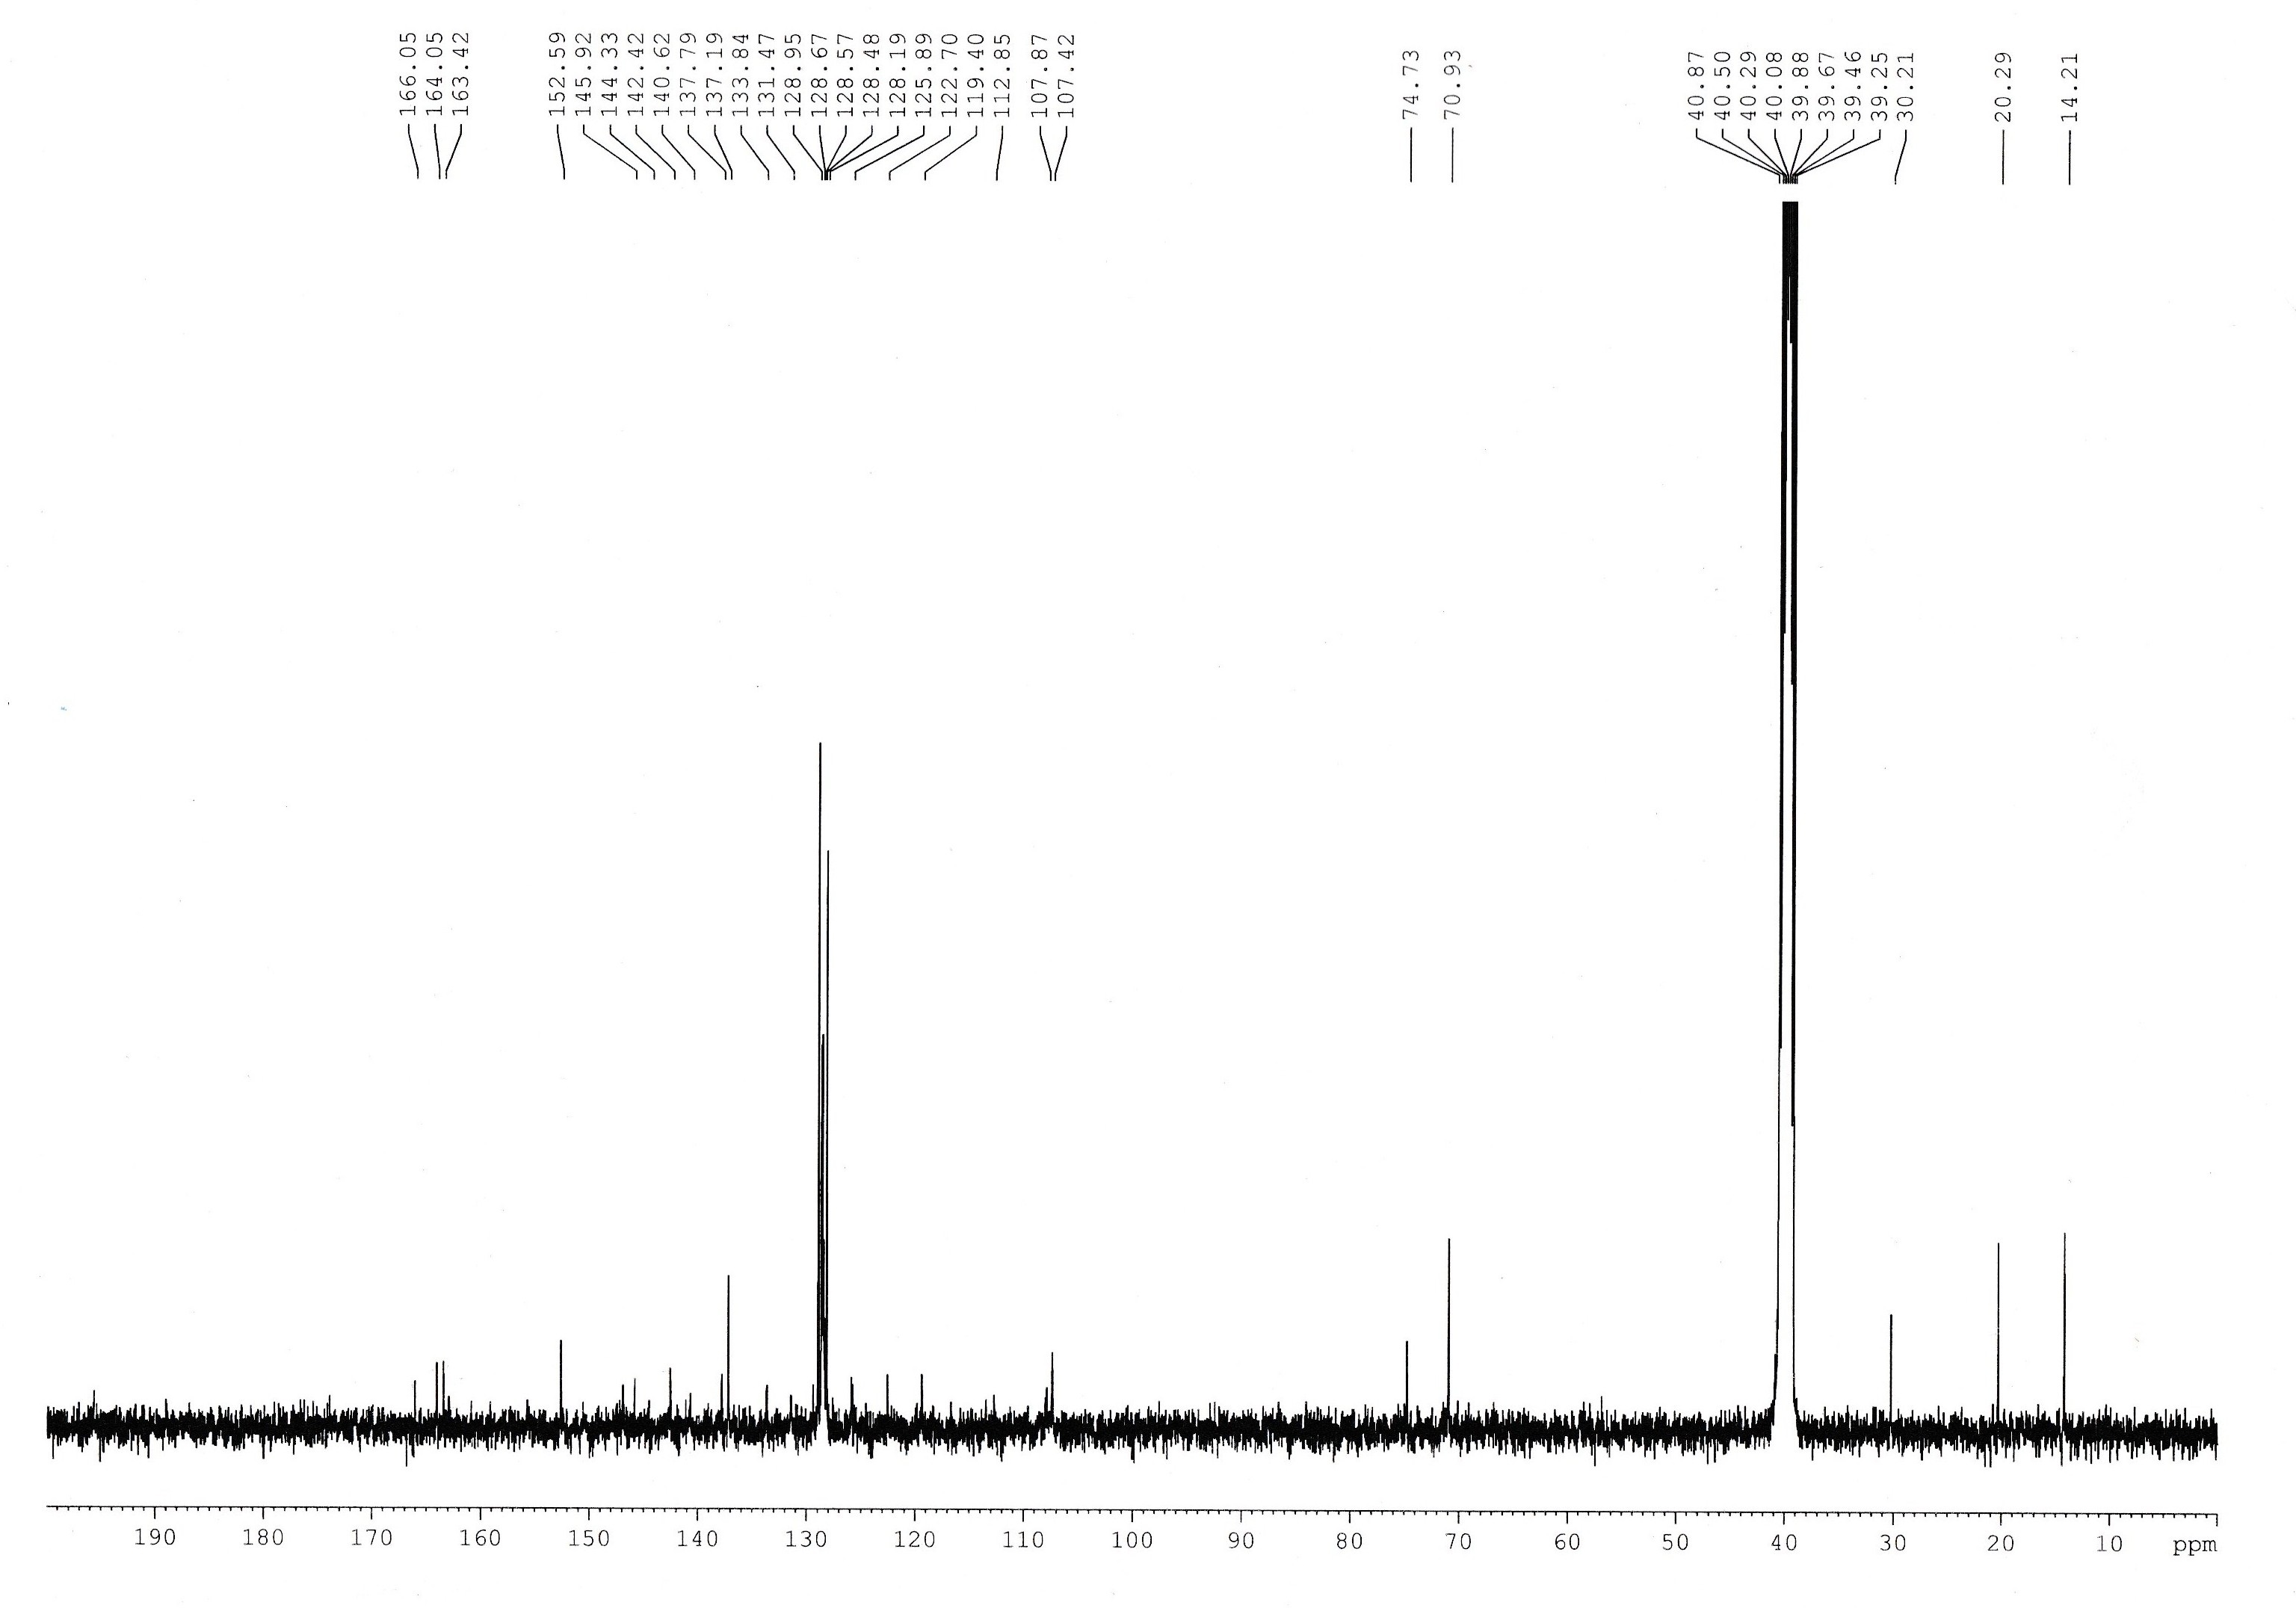


**Fig. 31S.** 13C NMR (100 MHz) of **1** in *d6*-DMSO.


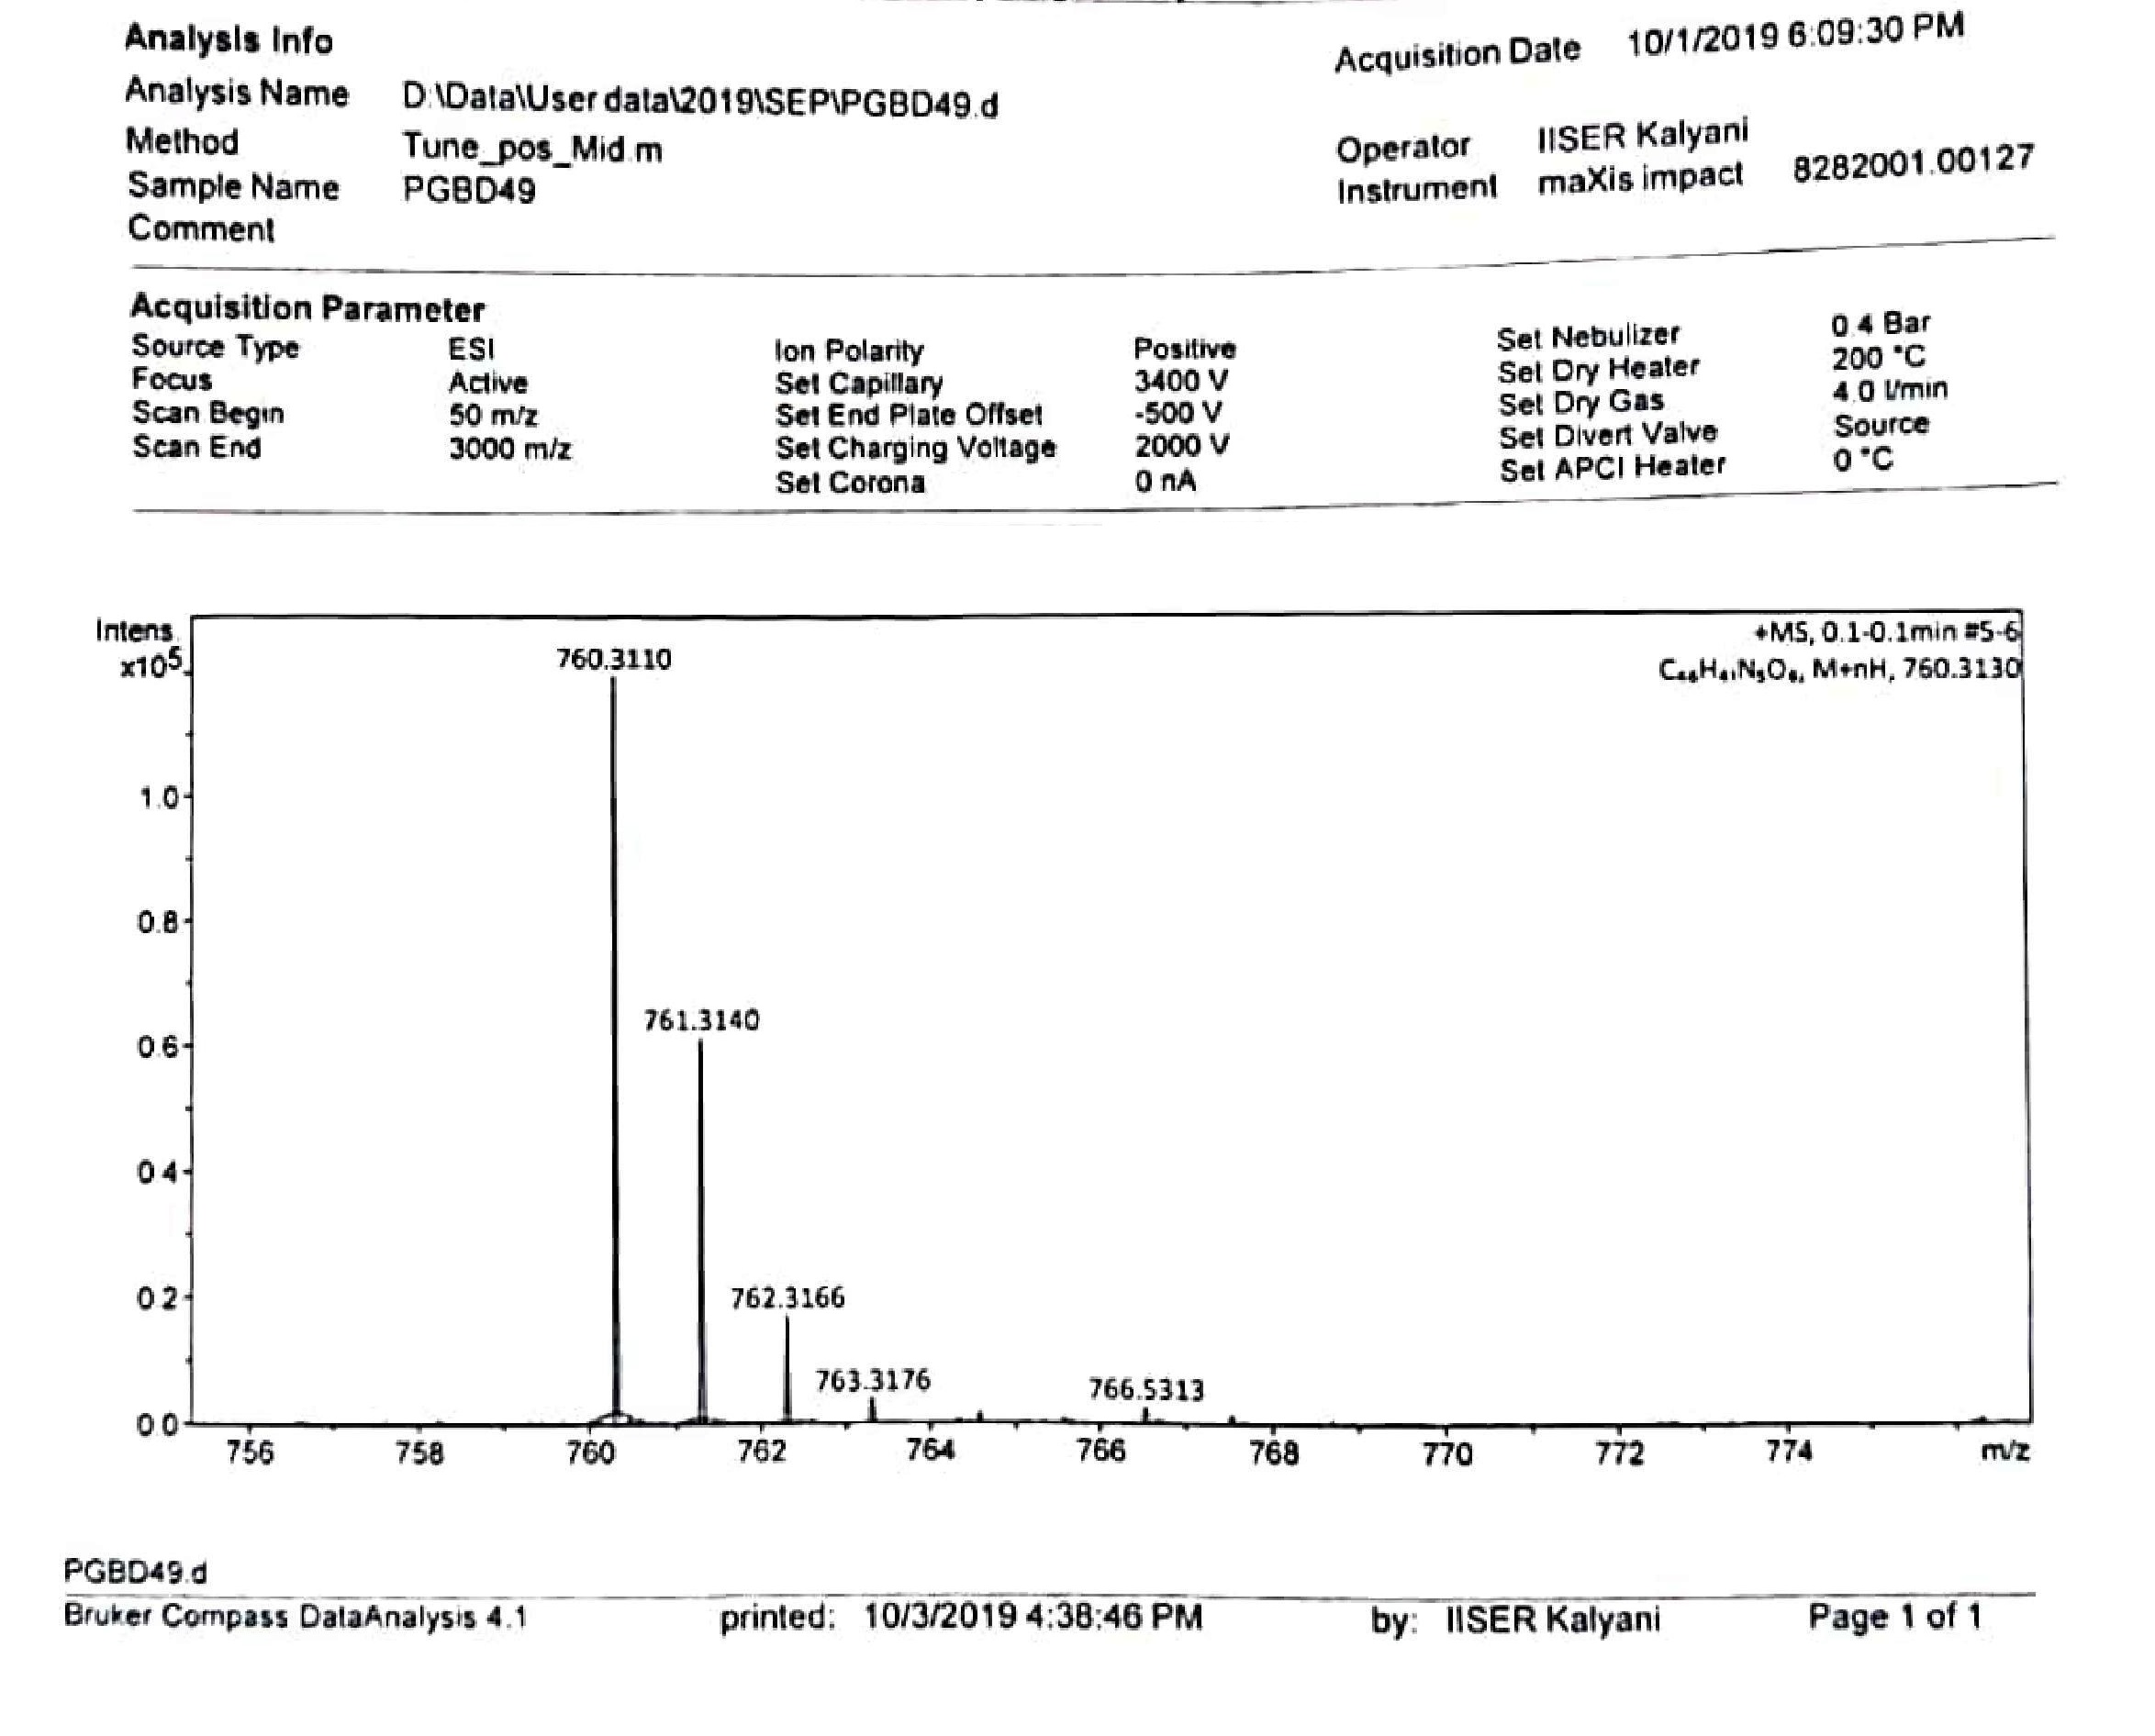

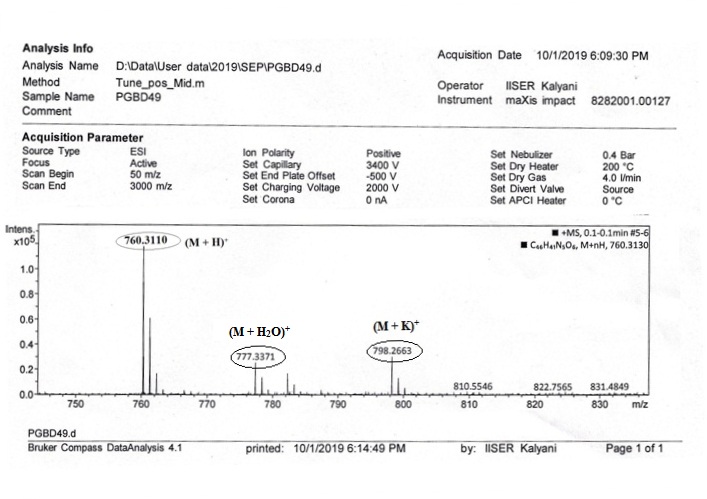


**Fig. 32S.** HRMS spectrum and isotopic mass distribution of compound **1**.
